# Supplementary material for: From Hong Kong Diabetes Register to JADE Program to RAMP-DM for Data-Driven Actions
Source: Oxford University Press journal article supplement (doi:10.2337/dci19-0003), 2019-09-17
Supplement: dci190003supplementarydata.pdf [file dci190003supplementarydata.pdf]

SUPPLEMENTARY DATA

From Hong Kong Diabetes Register to JADE Program to RAMP-DM for data-driven actions (SUPPLEMENTARY DATA)

Notes for Supplementary Figure 1.

The self-explanatory Joint Asia Diabetes Evaluation (JADE) personalized report is complete with key information including risk categories, demographic (notably age, disease duration), summary of risk factors and complications, 5-year probability of individual events, trends of control of HbA<sub>1c</sub>, blood pressure, LDL-cholesterol, and body weight together with recommended goals and decision support and medication list, available in eight languages. One version is generated for patients with recommendations focusing on self-management and adherence to medication, whilst another version is generated for healthcare providers focusing on early intervention and referral for structured patient education program.

(B) An example of the JADE personalized report

**Risk category based on modifiable risk factors, risk scores and complications.**

**Age, gender, disease duration and occupations.**

**Trends of risk factor control (blood glucose, blood pressure, blood cholesterol (ABC) and body weight) with decision support.**

The summary report of risk categorization, complications and risk factors are based on the results of the latest COMPREHENSIVE ASSESSMENT (CA) or FOLLOW UP (FU). The purpose of this report is to help doctors or healthcare professionals and people with diabetes start a dialogue, make informed decisions, individualize treatment goals and formulate a management plan.

**Risk Category**      **Recommendations**

**3**      **Overall risk for diabetic complications: High**  
 High risk for future diabetes complications and/or Low eGFR (<60 ml/min/1.73<sup>2</sup>) and/or having ≥ 3 risk factors.

as of 19-Aug-2013

This report is specially prepared for you by your doctor using the JADE program. Please make every effort to understand and act on the recommendations.

**Date of most recent contact:** 19-Aug-2013      **Disease duration:** 2 years

**Gender:** Female      **Age:** 61      **Ethnicity:** Chinese      **Occupation:** Housewife

**Recommendations**

**HbA<sub>1c</sub>**

- On target for BG control.

**HbA<sub>1c</sub> (mmol/mol)**

**BP**

- BP on target.

**LDL-C (Low-Density Lipoprotein Cholesterol)**

- Acceptable Blood cholesterol control. May need lower value if other risk factors such as high BP coexists.

**Weight and Waist Circumference**

- Aim to accumulate at least 150 minutes of brisk walking a week, increase level of activities at home and form of transportation to and from work.
- Avoid energy dense food e.g. those high sugar and fat content, increase intake of vegetables and fibres, reduce salt intake.
- 5-15% of weight loss will significantly improve your profile of risk factors, avoid fluctuating changes in BW, aim at losing 0.5-1 kg weight loss per week.
- Overweight.

**Cardiovascular-Renal Complications**

- Patient does not have any cardiovascular-renal complications.

**Risk Factors**

- Cholesty
- Albuminuria
- Dyslipidaemia: On lipid-lowering drug

**5-year Probability of Diabetes Complications**

The 5-year probability of diabetes complications is based on published results derived from the Hong Kong Diabetes Register and may not be applicable to all ethnic groups or patients living outside Hong Kong.

The 5-year probability of diabetes complications are based on data available at the latest COMPREHENSIVE ASSESSMENT (CA) or FOLLOW UP (FU) and will only be generated if required data are available.

The latest treatment targets and testing procedures are for recommendations only and should be individualized based on both doctors and patients' own recommendations to set and work towards a realistic goal to improve risk factor control and reduce risk for complications.

For more information, please visit the following websites: [www.af.org](http://www.af.org), [www.diabetes.org](http://www.diabetes.org)

Note: Different risk parameters may have different weightings, thus within the same risk level, there can be a wide range of 5-year probability of diabetes complication.

**CHD 0.86%** as of 19-Aug-2013

**Stroke 4.02%** as of 19-Aug-2013

**ESRD 1.72%** as of 19-Aug-2013

**Heart Failure 0.99%** as of 19-Aug-2013

**Prescription Details**

| Generic drug name | Dosage  | Frequency    | Route | Status              |
|-------------------|---------|--------------|-------|---------------------|
| Digoxin           | 250 mcg | (od) (daily) | Oral  | Renewed 19-Aug-2013 |
| Aspirin           | 80 mg   | (od) (daily) | Oral  | Renewed 19-Aug-2013 |
| Simvastatin       | 5 mg    | (bedtime)    | Oral  | Renewed 19-Aug-2013 |

**Next Visit**

Agreed Date for Next Contact: \_\_\_\_\_

**Disclaimer**

Asia Diabetes Foundation Limited referred to herein as "ADF" hereby expressly disclaims any and all liability as follows and all data, information and result including without limitation in connection with JADE across summaries and patient reports, whether manually based or otherwise, which is provided under the JADE Program shall be used for reference purposes only. The JADE Program is not intended in any phase or form to be used, conveyed, interpreted or applied as a substitute for professional medical care or advice which shall be provided by a doctor, physician or other qualified medical health care professional. Users of the JADE Program (including without limitation to patients and family members of patients), who receive, believe, rely or make decisions regarding their health or medical care based on the predictions provided by the JADE Program for or on their use, shall not be held liable for any adverse medical care or advice provided by any health care professional, including without limitation to any doctor or other medical health care provider. The JADE Program hereby disclaims the authority of the above pages not ADF including without limitation to ADF, employees and affiliates (if any) and holds no liability in any way for any decisions and/or consequences arising from or in relation to the assessment and/or interpretation of the results from the JADE Program. ADF is a charitable institution incorporated in Hong Kong and a subsidiary of the Chinese University of Hong Kong Foundation with a mission to advance positive means for the better understanding and care of diabetes and other chronic diseases. All rights including without limitation intellectual property belong to ADF. No part of any publication may be reproduced or transmitted in any form without the prior written permission of ADF. In the event of any dispute or discrepancy between the English version and the translation of other languages of this Disclaimer, the English version shall prevail.

**Summary of risk factors & complications.**

**5-year probability of critical illness based on validated risk equations.**

**Summary of medication.**

Copyright © Asia Diabetes Foundation Ltd. 2019. All Rights Reserved. Confidential and Not for distribution.

## SUPPLEMENTARY DATA

### Supplemental Notes for Figure 2.

Data of the health workforce availability were retrieved from the Organisation for Economic Co-operation and Development Health at a Glance 2017 (1). The proportions of patients with treatment goals attainment were based on audit reports and national and epidemiological surveys (as appropriate) with some variations in data reporting and healthcare settings (2-14). For HbA<sub>1c</sub> goal, the UK NDA used HbA<sub>1c</sub>≤7.5% (58 mmol/mol) (4). For BP goal, the Swedish NDR used systolic BP<140 mmHg (2); the UK NDA used BP≤140/80 mmHg (4); the JDDM Study Group used systolic BP<130 mmHg (7). For LDL-C goal, the Swedish NDR used TC<6.2 mmol/L (2); the Australian audit report used LDL-C<2.5 mmol/L (3); the Canadian DM-SCAN survey used LDL-C<2 mmol/L (5); the UK NDA used TC<5 mmol/L (4); the Taiwan nationwide survey used LDL-C<2.6 mmol/L or TC<4.1 mmol/L (10); the China CCMR-3B study used TC<4.5 mmol/L (11, 12). For all ABC goals, the USA NHANES used the current definition plus smoking cessation (6); the UK NDA used HbA<sub>1c</sub>≤7.5% (58 mmol/mol), BP≤140/80 mmHg, TC<5 mmol/L, and statin use (4); the Korean epidemiological survey used the current definition plus body mass index 18.5-24.9 kg/m<sup>2</sup> (8).

### Abbreviations

BP, blood pressure; CCMR-3B, China Cardiometabolic Registries Nationwide Assessment of Cardiovascular Risk Factors: Blood Glucose, Blood Pressure, and Blood Lipid – 3B; DM-SCAN, Diabetes Mellitus Status in Canada; JDDM, Japan Diabetes Clinical Data Management; LDL-C, low-density lipoprotein cholesterol; NDA, National Diabetes Audit; NDR, National Diabetes Register; NHANES, National Health and Nutritional Examination Survey. To convert TC or LDL-C to mg/dL, multiply by 38.67.

### References

1. OECD (2017), Health at a Glance 2017: OECD Indicators, OECD Publishing, Paris. Available from [http://dx.doi.org/10.1787/health\\_glance-2017-en](http://dx.doi.org/10.1787/health_glance-2017-en). Accessed on 24 July 2019.
2. Steinarsson AO, Rawshani A, Gudbjornsdottir S, Franzen S, Svensson AM, Sattar N. Short-term progression of cardiometabolic risk factors in relation to age at type 2 diabetes diagnosis: a longitudinal observational study of 100,606 individuals from the Swedish National Diabetes Register. *Diabetologia* 2018;61:599-606
3. Sainsbury E, Shi Y, Flack J, Colagiuri S. Burden of diabetes in Australia: its time for more action. Preliminary report. July 2018. Available from <https://sydney.edu.au/content/dam/corporate/documents/faculty-of-medicine-and-health/research/centres-institutes-groups/burden-of-diabetes-its-time-for-more-action-report.pdf>. Accessed on 24 July 2019.
4. United Kingdom National Diabetes Audit, 2017-2018: Care Processes and Treatment Targets Full Report. Health and Social Care Information Centre (HSCIC). Available from <https://digital.nhs.uk/data-and-information/publications/statistical/national-diabetes-audit/report>. Accessed on 24 July 2019.
5. Leiter LA, Berard L, Bowering CK, et al. Type 2 diabetes mellitus management in Canada: is it improving? *Can J Diabetes* 2013;37:82-89
6. Ali MK, Bullard KM, Saaddine JB, Cowie CC, Imperatore G, Gregg EW. Achievement of goals in U.S. diabetes care, 1999-2010. *N Engl J Med* 2013;368:1613-1624
7. Sakamoto M, Matsutani D, Minato S, et al. Seasonal Variations in the Achievement of Guideline Targets for HbA<sub>1c</sub>, Blood Pressure, and Cholesterol Among Patients With Type 2 Diabetes: A Nationwide Population-Based Study (ABC Study: JDDM49). *Diabetes Care* 2019;42:816-823

## SUPPLEMENTARY DATA

8. Jung JH, Lee JH, Noh JW, et al. Current Status of Management in Type 2 Diabetes Mellitus at General Hospitals in South Korea. *Diabetes Metab J* 2015;39:307-315
9. Luk AOY, Hui EMT, Sin MC, et al. Declining Trends of Cardiovascular-Renal Complications and Mortality in Type 2 Diabetes: The Hong Kong Diabetes Database. *Diabetes Care* 2017;40:928-935
10. Yu NC, Su HY, Chiou ST, et al. Trends of ABC control 2006-2011: a National Survey of Diabetes Health Promotion Institutes in Taiwan. *Diabetes Res Clin Pract* 2013;99:112-119
11. Huo X, Gao L, Guo L, et al. Risk of non-fatal cardiovascular diseases in early-onset versus late-onset type 2 diabetes in China: a cross-sectional study. *Lancet Diabetes Endocrinol* 2016;4:115-124
12. Ji L, Hu D, Pan C, et al. Primacy of the 3B approach to control risk factors for cardiovascular disease in type 2 diabetes patients. *Am J Med* 2013;126:925.e911-922
13. Unnikrishnan R, Anjana RM, Deepa M, et al. Glycemic control among individuals with self-reported diabetes in India--the ICMR-INDIAB Study. *Diabetes Technol Ther* 2014;16:596-603
14. Mithal A, Majhi D, Shunmugavelu M, Talwarkar PG, Vasawala H, Raza AS. Prevalence of dyslipidemia in adult Indian diabetic patients: A cross sectional study (SOLID). *Indian J Endocrinol Metab* 2014;18:642-647
